# Supplementary material for: Time to Total Knee Arthroplasty after Intra-Articular Hyaluronic Acid or Platelet-Rich Plasma Injections: A Systematic Literature Review and Meta-Analysis
Source: MDPI journal article supplement (doi:10.3390/jcm11143985), 2022-07-09
Supplement: s1 [file s1]

## **Supplementary Materials:**

**Table S1.** Characteristics of injection products and control care for knee osteoarthritis.

| Author and Year of Publication | Product                                           | Posology                                                        | Preparation of PRP                                                    | Control       | Posology of the Control Product      |
|--------------------------------|---------------------------------------------------|-----------------------------------------------------------------|-----------------------------------------------------------------------|---------------|--------------------------------------|
| Altman-dasa 2015 [38]          | HA                                                | -                                                               | -                                                                     | Standard care | -                                    |
| Delbarre 2017 [55]             | HA                                                | -                                                               | -                                                                     | IA CS         | -                                    |
| Ong 2016 [39]                  | HA                                                | -                                                               | -                                                                     | Standard care | -                                    |
| Altman-kim 2015 [37]           | HA                                                | -                                                               | -                                                                     | Standard care | -                                    |
| Ong 2019 a [41] *              | HA                                                | -                                                               | -                                                                     | Standard care | -                                    |
| Ong 2019 b [40] *              | HA                                                | -                                                               | -                                                                     | Standard care | -                                    |
| Etter 2020 [42]                | Hylan GF 20 (Orthovisc)                           | -                                                               | -                                                                     | Standard care | -                                    |
| Abbott 2013 [51]               | HA                                                | -                                                               | -                                                                     | Standard care | -                                    |
| Malanga 2020 [50]              | HA                                                | -                                                               | -                                                                     | Standard care | -                                    |
| Latourte 2022 [57]             | HA                                                | -                                                               | -                                                                     | Standard care | -                                    |
| Korzmaz 2013 [58]              | Adant                                             | 3 injections at 1-week interval                                 | -                                                                     | DICLOFENAC    | 75 mg × 2/day for 10 days            |
| Jurado 2012 [53]               | NASHA                                             | -                                                               | -                                                                     | Standard care | -                                    |
| Dasa 2018 [39]                 | HA                                                | -                                                               | -                                                                     | No            | -                                    |
| Waddell 2014 [44]              | Hylan GF 20                                       | One injection 6 mL or 3 injections of 2 mL at 1-week interval   | -                                                                     | No            | -                                    |
| Bowman 2018 [45]               | Sodium hyaluronate (Supartz, synvisc or euflexxa) | -                                                               | -                                                                     | No            | -                                    |
| Miler 2017[47]                 | Sodium Hyaluronate (Hyalgan)                      | 5 injections at 1-week interval                                 | -                                                                     | No            | -                                    |
| Turajane 2008 [59]             | Sodium Hyaluronate (Hyalgan)                      | 3 injections at 1-week interval                                 | -                                                                     | No            | -                                    |
| Lundstrom 2019 [46]            | HA                                                | -                                                               | -                                                                     | No            | -                                    |
| Anand 2018 [48]                | Sodium Hyaluronate                                | -                                                               | -                                                                     | No            | -                                    |
| Barrett 2002 [49]              | Sodium Hyaluronate                                | -                                                               | -                                                                     | No            | -                                    |
| Whitman 2010 [62]              | Supartz                                           | -                                                               | -                                                                     | No            | -                                    |
| Campbell 2004 [61]             | Hylan GF-20                                       | 3 injections of 2 mL at 1-week interval                         | -                                                                     | No            | -                                    |
| Evanich 2001 [52]              | Hylan GF-20                                       | 3 injections of 2 mL at 1-week interval                         | -                                                                     | No            | -                                    |
| Mazieres 2007 [56]             | Sodium Hyaluronate (Suplasyn)                     | 3 injections at 1-week interval                                 | -                                                                     | No            | -                                    |
| Annaniemi 2019 [60]            | HA                                                | 1 injection or 3 injections at 1-week interval                  | Commercial glo PRP kit: 10 mL blood centrifuged 5 min at 1200 rpm/min | PRP           | 3 injections at 10-14 days' interval |
| Sanchez 2020 [54]              | PRP                                               | 3 injections at 1-week interval or 1 IA injection with 2 intra- | 9 mL blood centrifuged at 580 g for 8 min at room temperature         | No            | -                                    |

|  |  |                                                            |  |  |  |
|--|--|------------------------------------------------------------|--|--|--|
|  |  | osseous injection followed by IA<br>injection 1 week later |  |  |  |
|--|--|------------------------------------------------------------|--|--|--|

CS = corticosteroids; HA = hyaluronic acid; IA = intra-articular; NASHA = Non-animal stabilized hyaluronic acid stabilized, PRP = platelet-rich plasma; - = not applicable.
